# Supplementary material for: Soluble PD-L1 and PD-1 Significantly Improve the Accuracy of a Diagnostic Model of mRNA Transcripts in the Diagnosis of Prostate Cancer
Source: Preprints.org preprint supplement (doi:10.20944/preprints202410.0035.v1), 2024-10-01
Supplement: Supplementary file 1 [file supplementary]

**Soluble PD-L1 and PD-1 significantly improve the accuracy of a diagnostic model of mRNA transcripts in the diagnosis of prostate cancer**

**Margarita Žvirblė1,2, Ieva Vaicekauskaitė1,2, Žilvinas Survila2, Paulius Bosas1, Neringa Dobrovolskiene1, Agata Mlynska1,3, Rasa Sabaliauskaitė1,2, Vita Pašukonienė1**

Supplementary materials


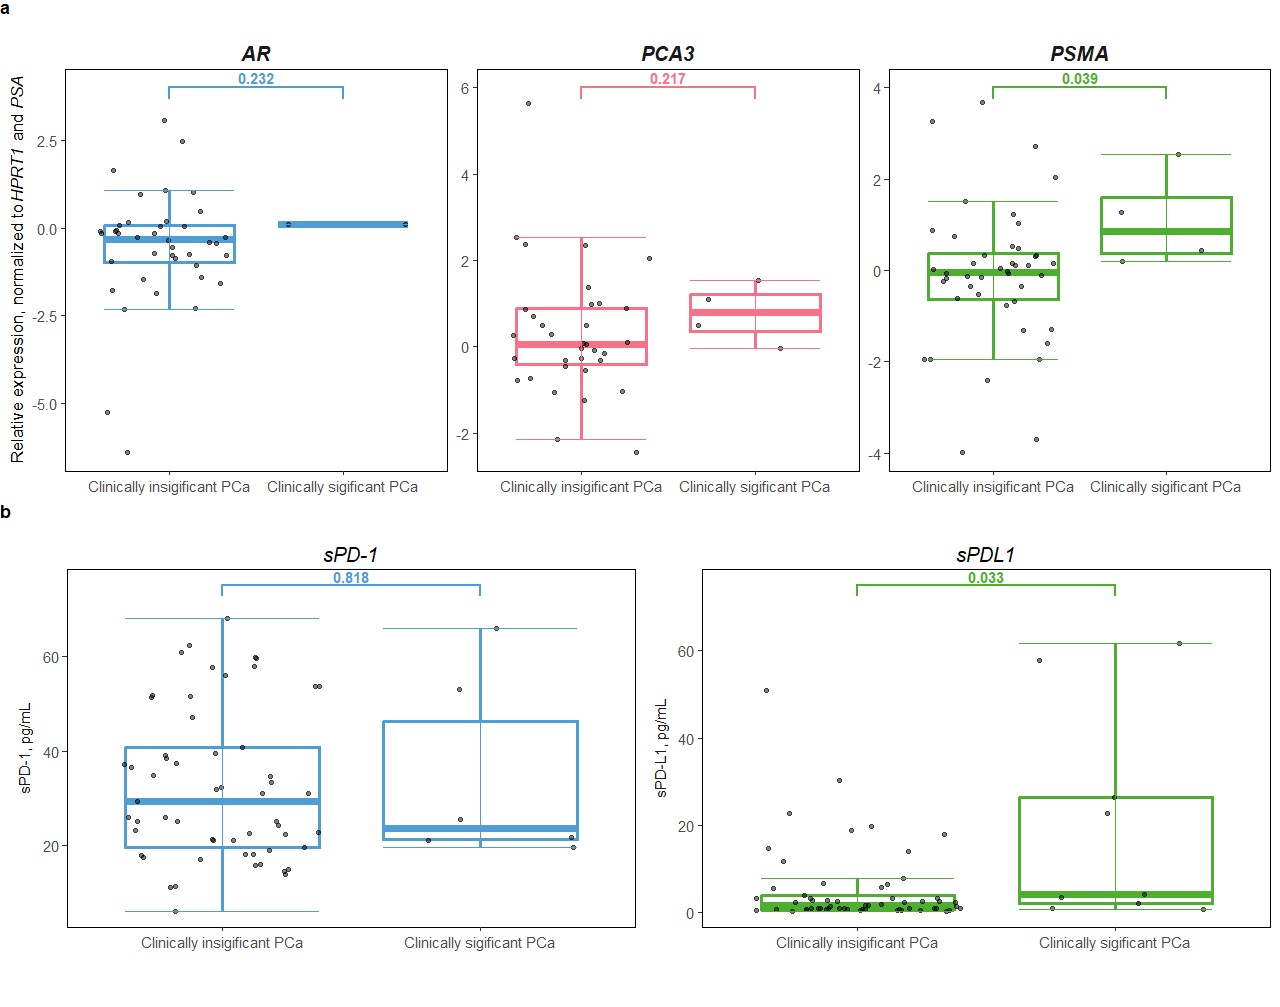


**Figure S1** Relative expression values of *AR*, *PCA3*, and *PSMA* mRNAs as well as sPD-L1 and sPD-1 in clinicly significant and insignificant PCa cases.

**A** Relative expression values of *AR*, *PCA3*, and *PSMA* mRNAs in clinicly significant (ISUP ≥3) and insignificant (ISUP ≤2) PCa cases (*PSMA* p = 0.039). **B** sPD-L1 and sPD-1 levels in clinicly significant and insignificant PCa cases (sPDL1 p = 0.033).


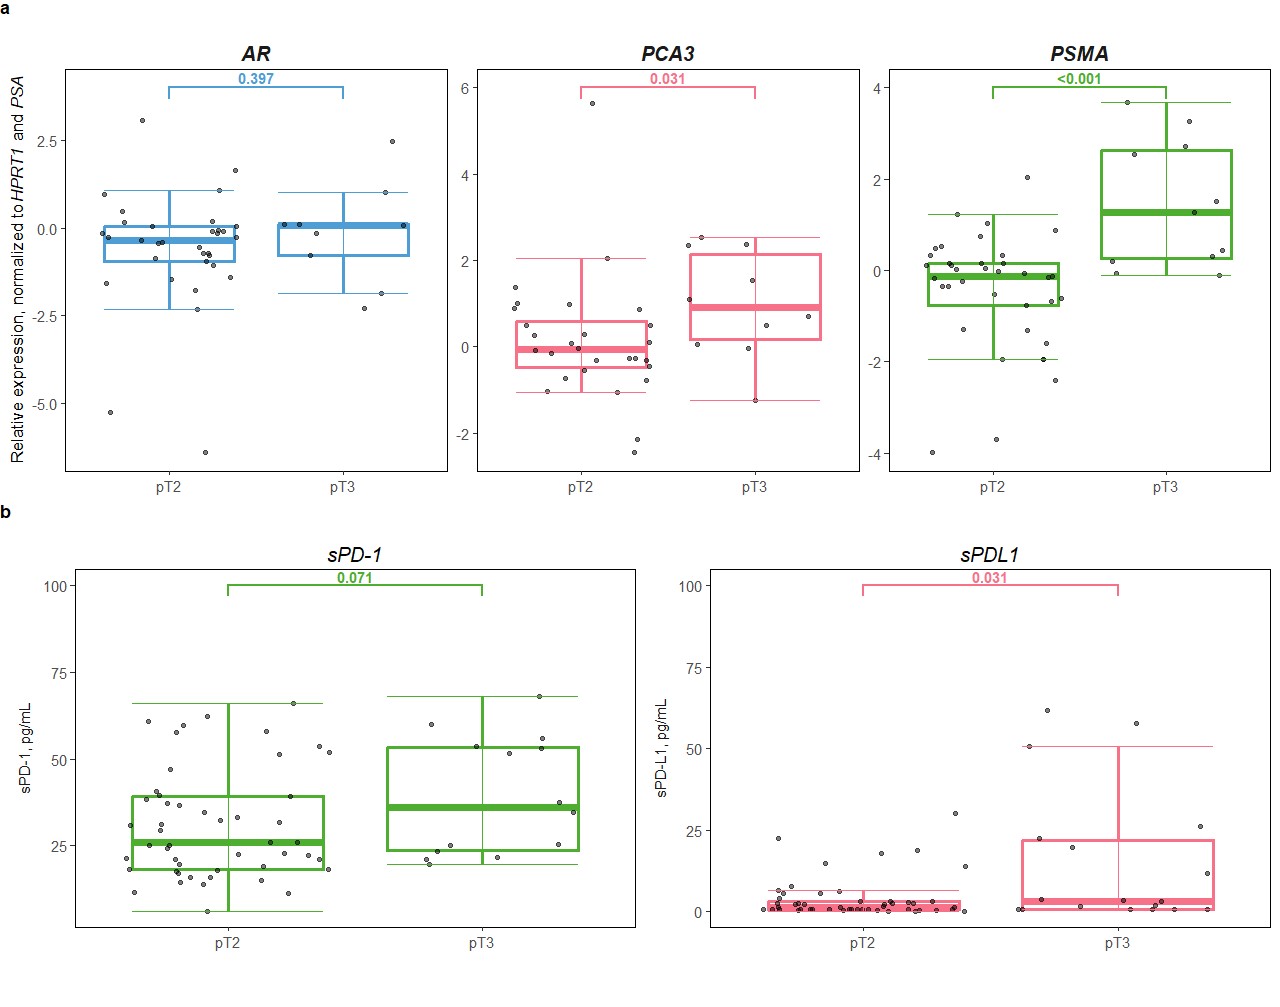


**Figure S2** Relative expression values of *AR*, *PCA3*, and *PSMA* mRNAs as well as sPD-L1 and sPD-1 in association with tumor stage.

**A** Relative expression values of *AR*, *PCA3*, and *PSMA* mRNAs in association with tumor stage. *PCA3* and *PSMA* p < 0.05. **B** sPD-L1 and sPD-1 levels in association with tumor stage. sPDL1 p = 0.031.


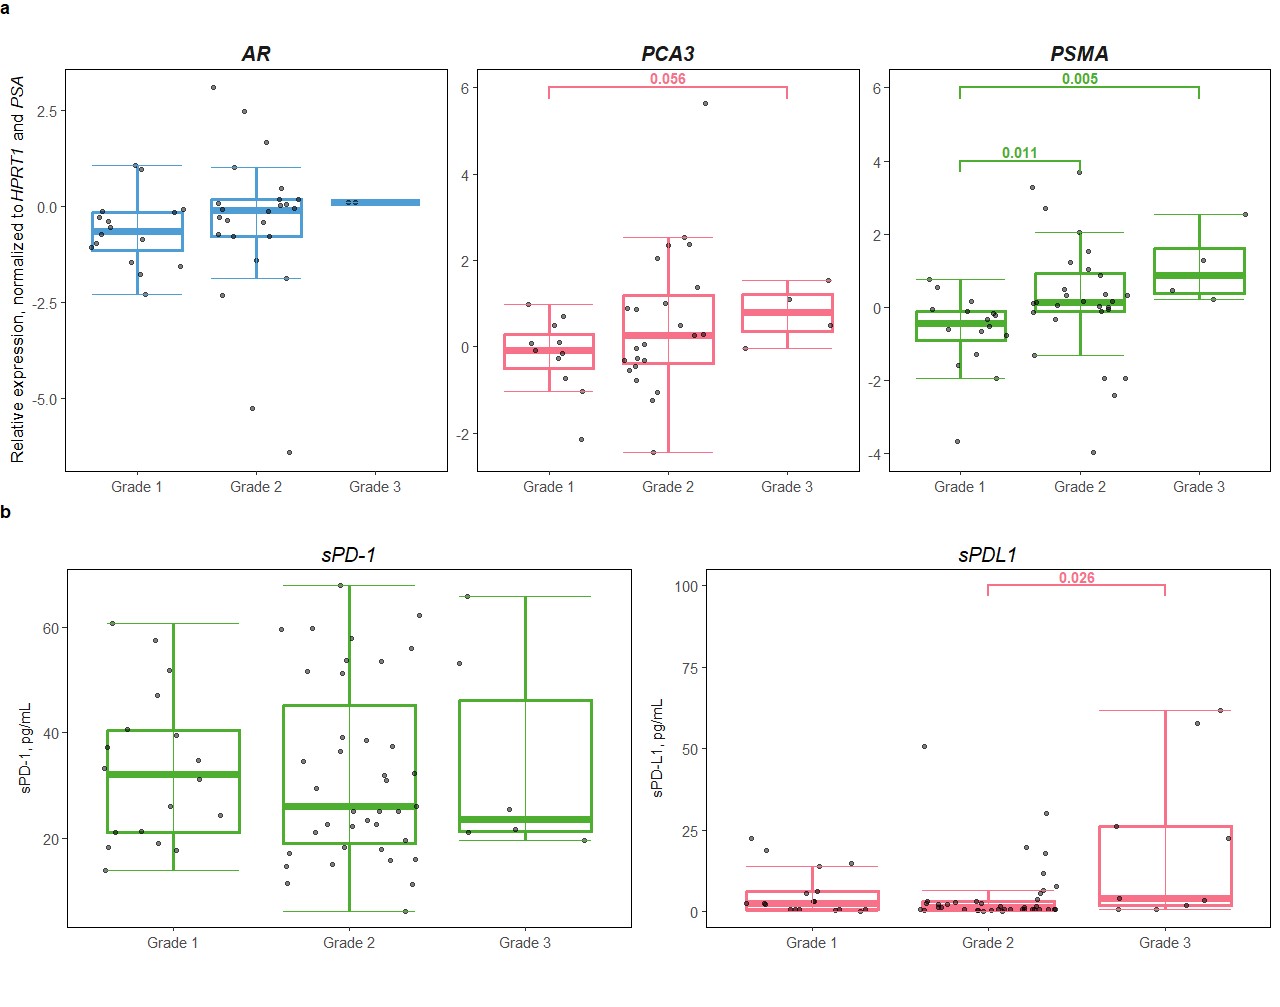


**Figure S3** Relative expression values of *AR*, *PCA3*, and *PSMA* mRNAs as well as sPD-L1 and sPD-1 in association with ISUP grading.

**A** Relative expression values of *AR*, *PCA3*, and *PSMA* mRNAs in association with ISUP grading. Grade 1 *vs* grade 3 *PSMA* p = 0.005, grade 1 vs grade 2 *PSMA* p = 0.011. **B** sPD-L1 and sPD-1 levels in association with ISUP grading. Grade 2 vs grade 3 sPDL1 = 0.026.
